# Supplementary material for: A hybrid CNN-RNN approach for survival analysis in a Lung Cancer Screening study
Source: PubMed Central journal article supplement (PMC10432611; doi:10.1016/j.heliyon.2023.e18695), 2023-08-03
Supplement: mmc2.pdf [file mmc2.pdf]

## Deep learning mortality prediction in NLST data

---

### Principal Investigator

**Name**

Joseph Jacob

**Degrees**

F.R.C.R., M.D.(Res).,

**Institution**

University College London

**Position Title**

Wellcome Trust Fellow

**Email**

[j.jacob@ucl.ac.uk](mailto:j.jacob@ucl.ac.uk)

### About this CDAS Project

**Study**

[NLST](#) (Learn more about this study)

**Project ID**

NLST-681

**Initial CDAS Request Approval**

Jun 26, 2020

**Title**

Deep learning mortality prediction in NLST data

**Summary**

In patients undergoing lung cancer screening, only 1-2% have lung cancer. The majority of patients are dying of other causes. These may relate to suspected damage in the heart for example, or unsuspected lesions on imaging. Deep learning methods could help elucidate features on CT imaging that link to mortality in lung cancer screening populations.

**Aims**

Use deep learning computer algorithms to identify features on NLST imaging that link to long-term mortality.

**Collaborators**

Prof Daniel Alexander, UCL

Prof Geoff Parker, UCL

Mr Moucheng Xu, UCL

Dr Cheung Wing Keung, UCL

Mr Ashkan Pakzad, UCL

Dr Arjun Nair, UCL

Dr Eyjolfur Gudmundsson, UCL

Dr Shahab Aslani

Dr Yaozhi Lu

Mr John McCabe

Mr Bojidar Rangelov
